# Supplementary material for: Dinuclear lanthanide(iii)/zinc(ii) complexes with methyl 2-pyridyl ketone oxime
Source: Royal Society of Chemistry journal article supplement (doi:10.1039/c5dt03663a), 2015-01-01
Supplement: c5dt03663a1.pdf [file c5dt03663a1.pdf]

ELECTRONIC SUPPLEMENTARY MATERIAL to:

**Dinuclear lanthanide(III)/ zinc(II) complexes from the use of methyl 2-pyridyl ketone oxime†**

Nikolaos C. Anastasiadis,<sup>a,b</sup> Christina D. Polyzou,<sup>a,b</sup> George Kostakis,<sup>a,c</sup>  
Vlasoula Bekiari,<sup>d</sup> Yanhua Lan,<sup>e</sup> Spyros P. Perlepes,<sup>b</sup> Konstantis F. Konidaris<sup>a\*</sup>  
and Annie K. Powell<sup>a,e,\*</sup>

<sup>a</sup> Institute of Nanotechnology, Karlsruhe Institute of Technology, Hermann-von-Helmholtz-Platz 1, 76344 Eggenstein-Leopoldshafen, Germany. E-mail: konstantis.konidaris@gmail.com

<sup>b</sup> Department of Chemistry, University of Patras, GR-265 04 Patras, Greece.

<sup>c</sup> Department of Chemistry, School of Life Sciences, University of Sussex, Brighton BN1 9QJ, U.K.

<sup>d</sup> Department of Aquaculture, Technological Educational Institute of Western Greece, GR-30200 Messolonghi, Greece.

<sup>e</sup> Institute of Inorganic Chemistry, Karlsruhe Institute of Technology, Engesserstrasse 15, 76131 Karlsruhe, Germany. E-mail: annie.powell@kit.edu

## SYNTHETIC DETAILS

All experiments were performed under aerobic conditions using materials (reagent grade) and solvents as received. The organic ligand mpko was prepared in typical yields of >80% following the reported method.<sup>1</sup>

### Preparation of [ZnEu(mpko)<sub>3</sub>(mpkoH)<sub>3</sub>](ClO<sub>4</sub>)<sub>2</sub>·2H<sub>2</sub>O (1·2H<sub>2</sub>O)

To a stirred, colourless solution of Zn(ClO<sub>4</sub>)<sub>2</sub>·6H<sub>2</sub>O (0.074 g, 0.2 mmol), mpkoH (0.164 g, 1.2 mmol) and Et<sub>3</sub>N (168  $\mu$ L, 0.6 mmol) in MeOH (10 mL) was added solid Eu(NO<sub>3</sub>)<sub>3</sub>·6H<sub>2</sub>O (0.178 g, 0.4 mmol). The solid soon dissolved and the resulting pale yellow solution was stirred for a further 5 min, filtered and the filtrate was stored in a closed vial at room temperature. After 2 d, pale yellow crystals of the product formed, which were collected by filtration, washed with cold MeOH (1 mL) and Et<sub>2</sub>O (2x5 mL), and dried in air. The yield was 60% (based on the Zn<sup>II</sup> available). The complex analysed satisfactorily as 1·2H<sub>2</sub>O (calculated formula C<sub>42</sub>H<sub>49</sub>ZnEuN<sub>12</sub>O<sub>16</sub>Cl<sub>2</sub>). Data are as follows (found values in parentheses): C, 39.84 (39.81); H, 3.90 (3.77); N, 13.28 (13.57) %. IR bands (KBr, cm<sup>-1</sup>): 3430mb [ $\nu$ (OH)], 3092w, 2802w, 1600s, 1561w, 1473m, 1439sh, 1375m, 1326w, 1256w, 1149m [ $\nu$ (NO)<sub>oximate/oxime</sub>], 1080vs [ $\nu_3$ (F<sub>2</sub>) of ClO<sub>4</sub><sup>-</sup>, i.e.  $\nu_d$  (ClO)], 1031vs, 1006sh, 958m, 782s, 747w, 695w, 679m [ $\delta$ (2-pyridyl ring)], 624m [ $\nu_4$ (F<sub>2</sub>) of ClO<sub>4</sub><sup>-</sup>, i.e.  $\delta_d$  (OClO)], 461w [ $\gamma$ (2-pyridyl ring)].

### Preparation of [ZnDy(NO<sub>3</sub>)<sub>2</sub>(mpko)<sub>3</sub>(mpkoH)](4)

To a stirred, almost colourless solution of Zn(ClO<sub>4</sub>)<sub>2</sub>·6H<sub>2</sub>O (0.074 g, 0.2 mmol), mpkoH (0.164 g, 1.2 mmol) and Et<sub>3</sub>N (168  $\mu$ L, 0.6 mmol) in MeOH (10 mL) was added solid Dy(NO<sub>3</sub>)<sub>3</sub>·6H<sub>2</sub>O (0.182 g, 0.4 mmol). The solid immediately dissolved and the resulting pale orange solution was stirred for a further 2 min, filtered and the filtrate was stored in a closed vial at room temperature. After 3 d, colourless crystals of the product were precipitated, collected by filtration, washed with cold MeOH (1 mL) and Et<sub>2</sub>O (2x5 mL), and dried in air. The yield was 50% (based on the Zn<sup>II</sup> available). The complex analysed satisfactorily as 4 (calculated formula C<sub>28</sub>H<sub>29</sub>ZnDyN<sub>10</sub>O<sub>10</sub>). Data are as follows (found values in parentheses): C, 37.64 (37.86); H, 3.27 (3.18); N, 15.68 (15.80) %. IR bands (KBr, cm<sup>-1</sup>): 3220mb [ $\nu$ (OH)],

3080w, 2930w, 1595vs, 1496s [ $\nu_1(A_1)$  of the bidentate chelating nitrate groups, i.e.  $\nu(\text{N=O})$ ], 1444s, 1384w, 1350w, 1294s, [ $\nu_5(B_2)$  of the bidentate chelating nitrate groups, i.e.  $\nu_{\text{as}}(\text{NO}_2)$ ], 1167w, 1135w [ $\nu(\text{NO})_{\text{oximate/oxime}}$ ], 1101w, 1033s, 1012sh, 961w, 818w, 783m, 745w, 679m [ $\delta(2\text{-pyridyl ring})$ ], 656w, 636w, 610w, 519w, 472w [ $\gamma(2\text{-pyridyl ring})$ ], 415w.

**Preparation of complexes [ZnGd(mpko)<sub>3</sub>(mpkoH)<sub>3</sub>](ClO<sub>4</sub>)<sub>2</sub>·2H<sub>2</sub>O (2·2H<sub>2</sub>O), [ZnTb(mpko)<sub>3</sub>(mpkoH)<sub>3</sub>](ClO<sub>4</sub>)<sub>2</sub>·2H<sub>2</sub>O (3·2H<sub>2</sub>O), and [ZnHo(NO<sub>3</sub>)<sub>2</sub>(mpko)<sub>3</sub>(mpkoH)](5)**

Complexes 2·2H<sub>2</sub>O and 3·2H<sub>2</sub>O were prepared in an identical manner with complex 1·2H<sub>2</sub>O by simply replacing Eu(NO<sub>3</sub>)<sub>3</sub>·6H<sub>2</sub>O with the corresponding hydrated nitrates of Gd(III) and Tb(III). The IR spectra of 1·2H<sub>2</sub>O (see above), 2·2H<sub>2</sub>O and 3·H<sub>2</sub>O are almost identical (superimposable) with a maximum wavenumber difference of 3 cm<sup>-1</sup>. Analytical data: For 2·2H<sub>2</sub>O (calculated formula C<sub>42</sub>H<sub>49</sub>ZnGdN<sub>12</sub>O<sub>16</sub>Cl<sub>2</sub>, found values in parentheses): C, 39.67 (39.82); H, 3.89 (3.79); N, 13.22 (13.46) %. For 3·2H<sub>2</sub>O (calculated formula C<sub>42</sub>H<sub>49</sub>ZnTbN<sub>12</sub>O<sub>16</sub>Cl<sub>2</sub>, found values in parentheses): C, 39.62 (39.48); H, 3.89 (3.97); N, 13.20 (13.36) %.

Complex 5 was prepared in an identical manner with complex 4 by simply replacing Dy(NO<sub>3</sub>)<sub>3</sub>·6H<sub>2</sub>O with Ho(NO<sub>3</sub>)<sub>3</sub>·6H<sub>2</sub>O. The IR spectra of 4 and 5 are almost identical (superimposable) with a maximum wavenumber difference of 2 cm<sup>-1</sup>. Analytical data for 5 (calculated formula C<sub>28</sub>H<sub>29</sub>ZnHoN<sub>10</sub>O<sub>10</sub>, found values in parentheses): C, 37.53 (37.81); H, 3.27 (3.19); N, 15.64 (15.25) %.

## SINGLE-CRYSTAL X-RAY CRYSTALLOGRAPHY IN BRIEF

Data for **1·2H<sub>2</sub>O** and **4** were collected at 180 K on a Stoe IPDS II area detector diffractometer using graphite-monochromated Mo  $\alpha$  radiation. Semi-empirical absorption corrections were applied using XPREP in SHELXTL.<sup>2</sup> The structures were solved using direct methods, followed by a full-matrix least-squares refinement against  $F^2$  (all data) using SHELXTL.<sup>2</sup> Anisotropic refinement was used for all ordered non-H atoms. Organic H atoms were placed at calculated positions, while coordinates of hydroxyl and aqua H atoms were either placed in calculated positions or located from the difference Fourier map and then constrained to ride on their parent atom with  $U_{\text{iso}}=1.5 U_{\text{eq}}$  (parent atom). CCDC numbers 1021513 (**1·2H<sub>2</sub>O**) and 1021514 (**4**).

### HYDROGEN BONDS IN THE CRYSTAL STRUCTURE OF **1·2H<sub>2</sub>O**

#### Intracationic H bonds

| D-H...A    | D...A (Å) | H...A (Å) | D-H...A (Å) | Symmetry operation |
|------------|-----------|-----------|-------------|--------------------|
| O1-H1...O6 | 2.554(8)  | 1.850     | 140.7       | $x, y, z$          |
| O2-H2...O4 | 2.478(8)  | 1.760     | 142.2       | $x, y, z$          |
| O3-H3...O5 | 2.538(9)  | 1.830     | 141.4       | $x, y, z$          |

There are also H bonds between the ClO<sub>4</sub><sup>-</sup> counterions (acceptors) and lattice H<sub>2</sub>O molecules (donors). Metric parameters: O16...O10 2.933 Å, H16B...O10 2.333 Å, O16-H16B...O10 126.3°; O15...O11 2.931 Å, H15D...O11 2.328 Å, O15-H15D...O11 126.6°; O15...O14 2.648 Å, H15E...O14 2.024 Å, O15-H15E...O14 157.6°.

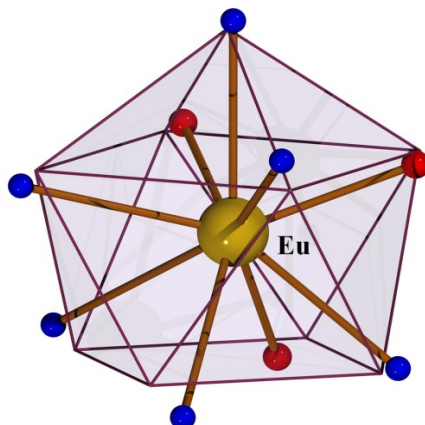

**Fig. S1** The capped square antiprismatic geometry of the  $\text{Eu}^{\text{III}}$  centre in the structure of  $1 \cdot 2\text{H}_2\text{O}$ ; the very small spheres define the vertices of the ideal polyhedron.

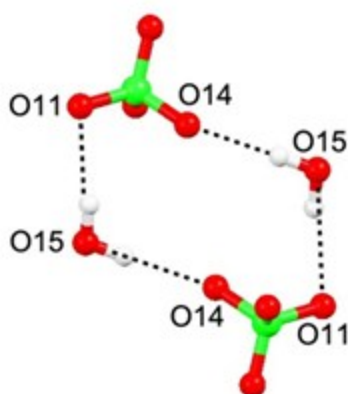

**Fig. S2** The H- bonded parallelogram of the type  $\text{HOH} \cdots \text{O}(\text{ClO}_2)\text{O} \cdots \text{HOH} \cdots \text{O}(\text{ClO}_2)\text{O}$  that is present in the crystal structure of  $1 \cdot 2\text{H}_2\text{O}$ ; this involves two symmetry-related  $\text{H}_2\text{O}$  molecules and  $\text{ClO}_4^-$  anions that belong to neighbouring unit cells.

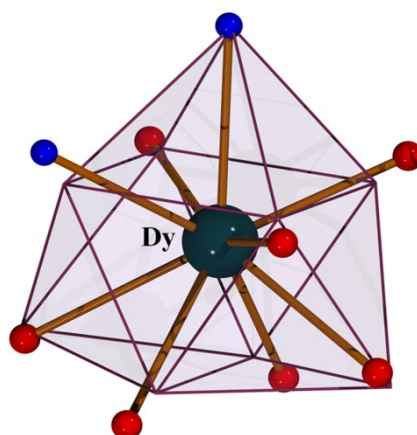

**Fig. S3** The capped square antiprismatic geometry of the Dy<sup>III</sup> centre in the structure of **4**; the very small spheres define the vertices of the ideal polyhedron.

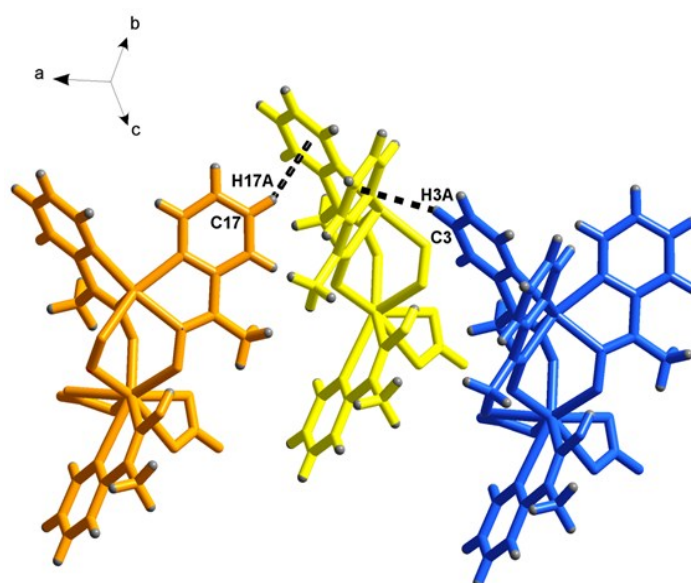

**Fig. S4** C-H... $\pi$  interactions (black dashed lines) in the crystal lattice of **4**; parts of the molecules have been omitted for clarity.

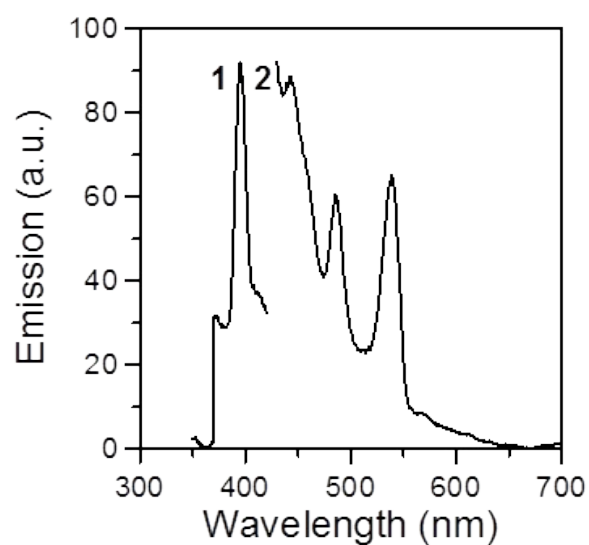

**Fig. S5** Solid-state room-temperature excitation (emission at 540 nm, curve 1) and emission (excitation at 400 nm, curve 2) for complex  $1 \cdot 2\text{H}_2\text{O}$ .

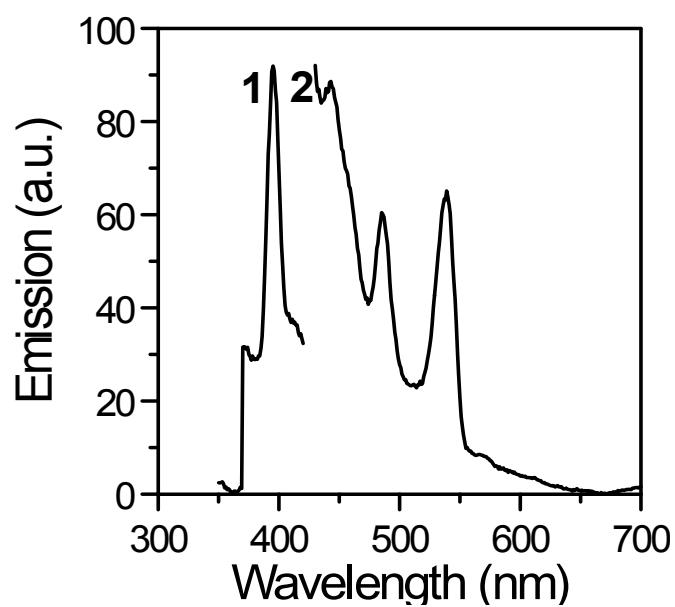

**Fig. S6** Solid-state room temperature excitation (emission at 540 nm, curve 1) and emission (excitation at 400 nm, curve 2) for complex  $3 \cdot 2\text{H}_2\text{O}$ .

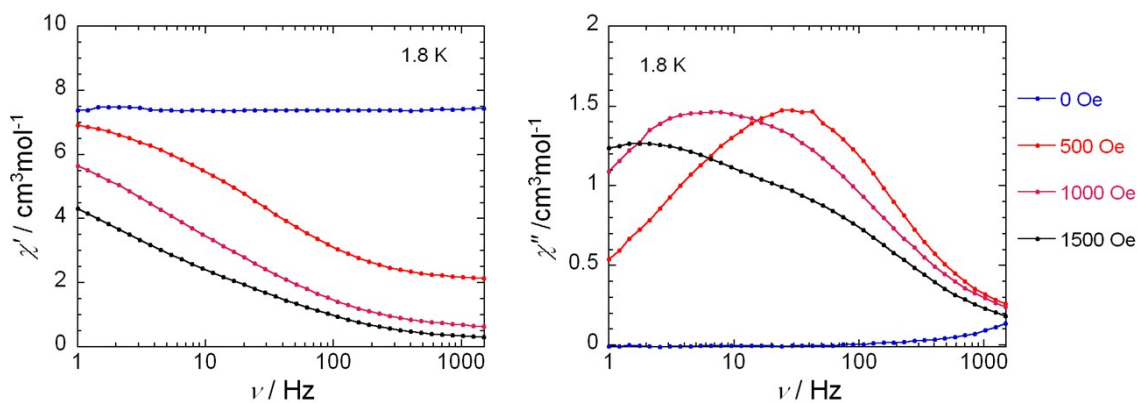

**Fig. S7** Frequency dependence of the in-phase ( $\chi'$ , left) and out-of-phase ( $\chi''$ , right) magnetic susceptibilities for **4** under different (0, 500, 1000 and 1500 Oe) dc fields at 1.8 K.

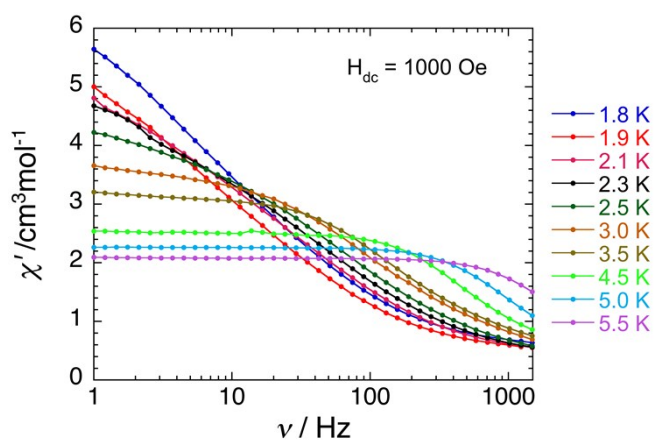

**Fig. S8** Frequency dependence of the in-phase ( $\chi'$ ) component of the ac susceptibility under an external dc field of 1000 Oe at the indicated temperatures for complex **4**.

**Table S1** Continuous Shape Measures (CShM) values for the possible coordination polyhedra of the 9-coordinate Ln<sup>III</sup> ions (Ln = Eu, Dy) in the molecular structures of **1**·2H<sub>2</sub>O and **4**<sup>a,b</sup>

| Ideal polyhedron                   | Complex <b>1</b> ·2H <sub>2</sub> O | Complex <b>4</b> |
|------------------------------------|-------------------------------------|------------------|
| Enneagon                           | 32.18447                            | 34.03600         |
| Octagonal pyramid                  | 24.48622                            | 24.26826         |
| Heptagonal bipyramid               | 17.54353                            | 17.14165         |
| Johnson triangular cupola J3       | 13.13307                            | 13.90252         |
| Capped cube J8                     | 9.10721                             | 8.75379          |
| Spherical-relaxed capped cube      | 8.08157                             | 7.87166          |
| Capped square antiprism J10        | 2.26502                             | 3.19278          |
| Spherical capped square antiprism  | <b>1.80735</b>                      | <b>2.34820</b>   |
| Tricapped trigonal prism J51       | 2.02863                             | 2.96985          |
| Spherical tricapped trigonal prism | 1.80967                             | 2.36835          |
| Tridiminished icosahedron J63      | 11.34007                            | 11.24506         |
| Hula-hoop                          | 12.07364                            | 10.50385         |
| Muffin                             | 2.26405                             | 2.35765          |

<sup>a</sup> The smallest value (in bold) defines the best polyhedron. <sup>b</sup> Chemically significant distortions give CShM values of 0.1 or higher, while values larger than 3 indicate important distortions.

## REFERENCES FOR THE ESI

<sup>1</sup> M. Orama, H. Saarinen and J. Korvenranta, *J. Coord. Chem.*, 1990, **22**, 183.

<sup>2</sup> G. M. Sheldrick, *Acta Crystallogr., Sect. A*, 2008, **64**, 112.
